# Supplementary material for: Evaluation of Enterotoxins and Antimicrobial Resistance in Microorganisms Isolated from Raw Sheep Milk and Cheese: Ensuring the Microbiological Safety of These Products in Southern Brazil
Source: MDPI journal article supplement (doi:10.3390/microorganisms11061618), 2023-06-20
Supplement: s1 [file s1]

**Supplementary table S1.** Compiled results of raw sheep's milk microbiological quality and resistance studies.

| Samples              | Mesophiles | Total coliforms | <i>E. coli</i> | <i>S. aureus</i> | Enterotoxins | N° of isolates | Identified species                                          | Antimicrobial resistance                                                                                         | Resistance genes                                                                         |
|----------------------|------------|-----------------|----------------|------------------|--------------|----------------|-------------------------------------------------------------|------------------------------------------------------------------------------------------------------------------|------------------------------------------------------------------------------------------|
| <b>Farm 1 (milk)</b> | 7.0E+3     | 3.1E+1          | 2.1E+1         | 2.8E+3           | Negative     | 13             | <i>S. simulans</i> ,<br><i>S. sciuri</i>                    | Oxacillin, Cefovecin, Benzylpenicillin,                                                                          | <i>tetL</i> , <i>sul1</i> ,<br><i>ermB</i> , <i>tetM</i> ,<br><i>strA</i>                |
|                      | 8.7E+4     | 9.0E+0          | 0.0E+0         | 2.0E+3           | Negative     |                |                                                             | Ceftiofur, Kanamycin, Neomycin,                                                                                  |                                                                                          |
|                      | 7.6E+4     | 1.7E+1          | 0.0E+0         | 2.7E+3           | Negative     |                |                                                             | Pradofloxacin, Clindamycin,                                                                                      |                                                                                          |
|                      | 6.1E+4     | 2.5E+1          | 2.0E+0         | 2.0E+3           | Negative     |                |                                                             | Tetracycline, Chloramphenicol,                                                                                   |                                                                                          |
|                      | 9.0E+4     | 2.6E+1          | 0.0E+0         | 1.8E+3           | Negative     |                |                                                             | Trimethoprim, Erythromycin                                                                                       |                                                                                          |
| <b>Farm 2 (milk)</b> | 3.8E+4     | 1.8E+3          | 3.0E+0         | 1.0E+3           | Negative     | 1              | <i>S. sciuri</i>                                            | Oxacillin, Cefovecin                                                                                             | <i>ermB</i> , <i>tetM</i>                                                                |
|                      | 5.2E+4     | 3.7E+1          | 0.0E+0         | 5.3E+3           | Positive     |                |                                                             |                                                                                                                  |                                                                                          |
|                      | 4.8E+4     | 1.7E+2          | 0.0E+0         | 3.8E+3           | Negative     |                |                                                             |                                                                                                                  |                                                                                          |
|                      | 6.5E+4     | 6.1E+3          | 2.0E+0         | 1.8E+3           | Negative     |                |                                                             |                                                                                                                  |                                                                                          |
|                      | 3.2E+4     | 7.9E+3          | 9.0E+0         | 1.9E+3           | Negative     |                |                                                             |                                                                                                                  |                                                                                          |
| <b>Farm 3 (milk)</b> | 6.0E+4     | 4.0E+2          | 1.9E+2         | 2.2E+3           | Negative     | 10             | <i>S. simulans</i> ,<br><i>S. sciuri</i> , <i>S. aureus</i> | Oxacillin, Cefovecin, Benzylpenicillin,                                                                          | <i>tet L</i> , <i>sul1</i> ,<br><i>sul2</i> , <i>ermB</i> ,<br><i>tetM</i> , <i>strA</i> |
|                      | 3.0E+4     | 8.7E+2          | 7.0E+1         | 4.0E+3           | Negative     |                |                                                             | Ceftiofur, Kanamycin, Neomycin,                                                                                  |                                                                                          |
|                      | 3.3E+4     | 4.5E+3          | 1.9E+2         | 4.6E+3           | Negative     |                |                                                             | Pradofloxacin, Clindamycin,                                                                                      |                                                                                          |
|                      | 3.2E+4     | 3.8E+2          | 1.3E+2         | 4.0E+3           | Negative     |                |                                                             | Tetracycline, Chloramphenicol,                                                                                   |                                                                                          |
|                      | 3.3E+4     | 4.1E+3          | 1.3E+2         | 2.4E+3           | Negative     |                |                                                             | Trimethoprim, Doxycycline,<br>Enrofloxacin, Amoxicillin,<br>Marbofloxacin, Cephalotin, Ampicillin,<br>Rifampicin |                                                                                          |

**Supplementary table S2.** Compiled results of raw sheep's cheese microbiological quality and resistance studies.

| Samples              | Mesophiles | Total coliforms | <i>E. coli</i> | <i>S. aureus</i> | Enterotoxins | N° of isolates | Identified species                         | Antimicrobial resistance                                                                                                | Resistance genes                    |
|----------------------|------------|-----------------|----------------|------------------|--------------|----------------|--------------------------------------------|-------------------------------------------------------------------------------------------------------------------------|-------------------------------------|
| <b>Feta-Type</b>     | 4.4E+5     | 2.6E+2          | 0.0E+0         | 0.0E+0           | Negative     | 8              | <i>S. lentus, S. sciuri</i>                | Rifampicin, Benzylpenicillin, Oxacillin, Cefovecine, Ceftiofur, Clindamycin                                             | <i>tetL, sul1, ermB, tetM, strA</i> |
|                      | 4.5E+5     | 0.0E+0          | 0.0E+0         | 0.0E+0           | Negative     |                |                                            |                                                                                                                         |                                     |
|                      | 1.4E+5     | 0.0E+0          | 0.0E+0         | 0.0E+0           | Negative     |                |                                            |                                                                                                                         |                                     |
|                      | 5.4E+6     | 1.9E+2          | 0.0E+0         | 0.0E+0           | Negative     |                |                                            |                                                                                                                         |                                     |
|                      | 6.0E+6     | 1.5E+5          | 0.0E+0         | 0.0E+0           | Negative     |                |                                            |                                                                                                                         |                                     |
| <b>Colonial</b>      | 8.3E+3     | 0.0E+0          | 0.0E+0         | 0.0E+0           | Negative     | 3              | <i>S. pseudintermedius, S. chromogenes</i> | Benzylpenicillin, Oxacillin, Cephalothin, Cefovecine, Ceftiofur, Pradofloxacin, Erythromycin, Clindamycin, Tetracycline | <i>ermB, tetM, AAC(6), strA</i>     |
|                      | 3.0E+4     | 0.0E+0          | 0.0E+0         | 0.0E+0           | Negative     |                |                                            |                                                                                                                         |                                     |
|                      | 3.4 E+4    | 0.0E+0          | 0.0E+0         | 0.0E+0           | Negative     |                |                                            |                                                                                                                         |                                     |
|                      | 1.3E+5     | 0.0E+0          | 0.0E+0         | 0.0E+0           | Negative     |                |                                            |                                                                                                                         |                                     |
|                      | 2.9E+5     | 0.0E+0          | 0.0E+0         | 0.0E+0           | Negative     |                |                                            |                                                                                                                         |                                     |
| <b>Fresh</b>         | 1.7E+5     | 1.2E+3          | 0.0E+0         | 6.4E+1           | Negative     | 0              | Not performed                              | Not performed                                                                                                           | Not performed                       |
|                      | 3.5E+5     | 2.4E+3          | 0.0E+0         | 1.8E+1           | Negative     |                |                                            |                                                                                                                         |                                     |
|                      | 3.1E+5     | 8.1E+2          | 0.0E+0         | 1.0E+1           | Negative     |                |                                            |                                                                                                                         |                                     |
|                      | 3.0E+5     | 1.3E+3          | 2.6E+2         | 6.0E+1           | Negative     |                |                                            |                                                                                                                         |                                     |
|                      | 4.7E+5     | 3.2E+3          | 9.3E+2         | 0.0E+0           | Negative     |                |                                            |                                                                                                                         |                                     |
| <b>Pecorino-Type</b> | 2.1E+5     | 0.0E+0          | 0.0E+0         | 0.0E+0           | Negative     | 4              | <i>S. lentus, S. warneri</i>               | Rifampicin, Benzylpenicillin, Erythromycin                                                                              | <i>sul1, tetW, strA</i>             |
|                      | 2.0E+5     | 0.0E+0          | 0.0E+0         | 0.0E+0           | Negative     |                |                                            |                                                                                                                         |                                     |
|                      | 4.1E+6     | 1.1E+3          | 0.0E+0         | 0.0E+0           | Negative     |                |                                            |                                                                                                                         |                                     |
|                      | 6.4E+6     | 2.8E+3          | 0.0E+0         | 0.0E+0           | Negative     |                |                                            |                                                                                                                         |                                     |
|                      | 2.7E+5     | 1.2E+2          | 0.0E+0         | 1.5E+2           | Negative     |                |                                            |                                                                                                                         |                                     |
